# Supplementary material for: Electroconductive and injectable hydrogels based on gelatin and PEDOT:PSS for a minimally invasive approach in nervous tissue regeneration
Source: Royal Society of Chemistry journal article supplement (doi:10.1039/d2bm00116k), 2022-01-01
Supplement: d2bm00116k1.pdf [file d2bm00116k1.pdf]

# SUPPORTING INFORMATION

## **Electroconductive and biocompatible hydrogels based on gelatin and PEDOT:PSS for a mini-invasive approach in neural tissue regeneration**

Franco Furlani<sup>1\*</sup>, Margherita Montanari<sup>1</sup>, Nicola Sangiorgi<sup>1</sup>, Emanuela Saracino<sup>2</sup>,  
Elisabetta Campodoni<sup>1</sup>, Alessandra Sanson<sup>1</sup>, Valentina Benfenati<sup>2</sup>, Anna Tampieri<sup>1</sup>,  
Silvia Panseri<sup>1</sup>, and Monica Sandri<sup>1\*</sup>

<sup>1</sup> National Research Council of Italy - Institute of Science and Technology for Ceramics  
(ISTEC-CNR), Via Granarolo 64, I – 48018, Faenza (RA), Italy

<sup>2</sup> National Research Council of Italy - Institute of Organic Synthesis and Photoreactivity (ISOF-  
CNR), Via Gobetti, 101, I – 40129, Bologna, Italy

**\* Corresponding authors**

**E-mail: [franco.furlani@istec.cnr.it](mailto:franco.furlani@istec.cnr.it)**

**[monica.sandri@istec.cnr.it](mailto:monica.sandri@istec.cnr.it)**

| Gelatin %<br>(w/w respect to the total<br>weight of the sample) | Genipin %<br>(w/w respect to gelatin) | Gelation<br>(yes/no) |
|-----------------------------------------------------------------|---------------------------------------|----------------------|
| 5                                                               | 0.25                                  | no                   |
| 5                                                               | 0.5                                   | no                   |
| 5                                                               | 1                                     | no                   |
| 10                                                              | 0.1                                   | no                   |
| 10                                                              | 0.2                                   | no                   |
| 10                                                              | 0.5                                   | no                   |
| 10                                                              | 1                                     | yes                  |

24

25 **Table S1.** Composition of samples tested. Concentrations of gelatin, genipin and features of resulting  
26 samples at 37°C are reported.

27

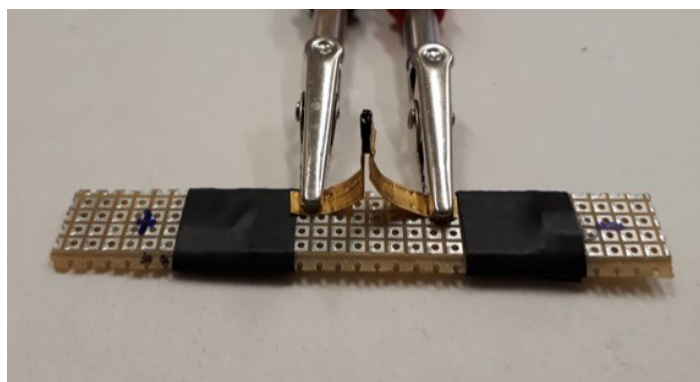

28

29 **Figure S1.** Experimental set-up used for Electrochemical Impedance Spectroscopy (EIS) analyses. The  
30 electroconductive hydrogel sample was tested between the gold electrodes. Experimental conditions:  
31 [gelatin] = 10% (w/w respect to the total weight of the sample), [genipin] = 0.1% (w/w respect to gelatin),  
32 and [PEDOT:PSS] = 0.3% (w/w respect to the total weight of the sample).

33

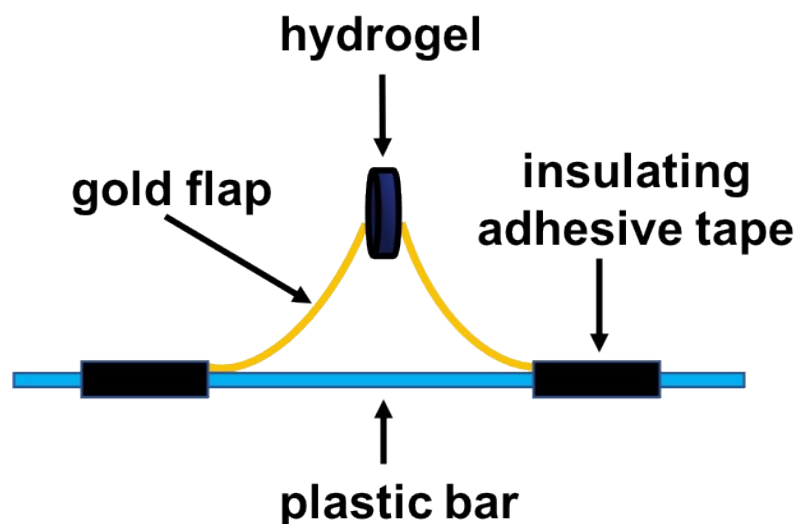

34

35 **Scheme S1.** Schematic representation of experimental set-up used for Electrochemical Impedance  
 36 Spectroscopy analyses.

37

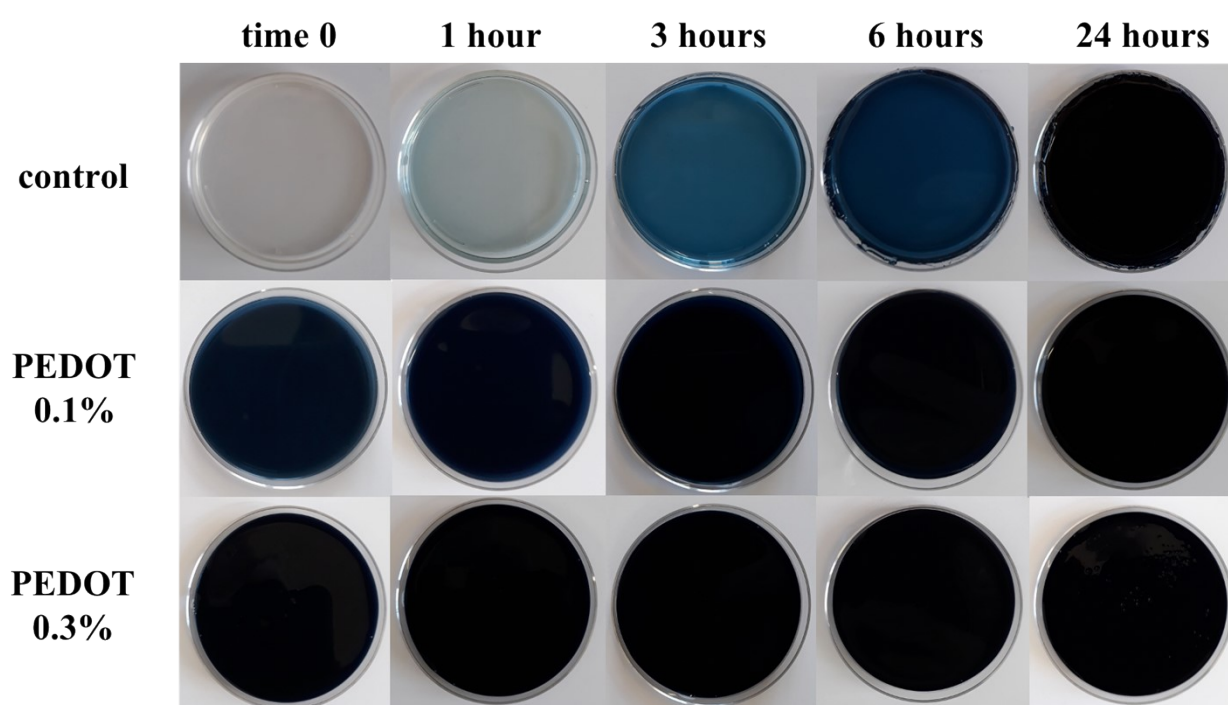

38

39 **Figure S2.** Visual analyses of gelatin-based matrices at different timeframes, *i.e.* immediately after genipin  
 40 addition (time 0) and after 1, 3, 6 and 24 hours. Experimental conditions: [gelatin] = 10% (w/w respect to the  
 41 total weight of the sample), [genipin] = 1% (w/w respect to gelatin), and [PEDOT:PSS] = 0 - 0.3% (w/w  
 42 respect to the total weight of the sample),  $T = 37^\circ\text{C}$ .

43

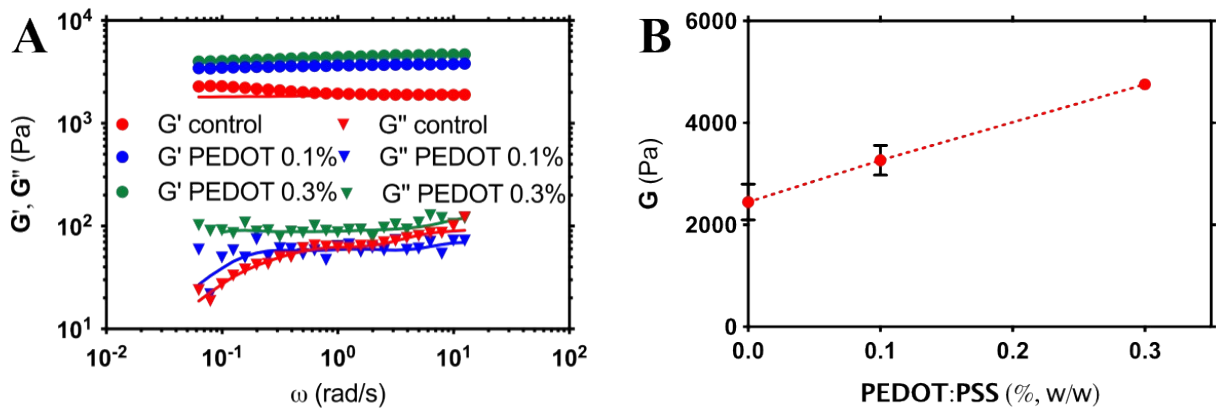

44

45 **Figure S3.** Mechanical characterization by rheology. (A) Dependence of storage ( $G'$ , circles) and loss  
 46 moduli ( $G''$ , triangles) on angular frequency,  $\omega$ , for gelatin-based hydrogels with different amounts of  
 47 PEDOT:PSS: [PEDOT:PSS] = 0% (w/w) (red), [PEDOT:PSS] = 0.1% (w/w) (blue), and [PEDOT:PSS] =  
 48 0.3% (w/w) (green). Solid lines are the best fit of experimental points according to eq. 1 and 2. (B)  
 49 Dependence of the shear modulus,  $G$ , on the amount of PEDOT:PSS.  $G$  values were determined according to  
 50 eq. 3. data are reported as means  $\pm$  standard deviations (SD) of at least three measurements. The dotted line  
 51 is drawn to guide the eye. Experimental conditions: [gelatin] = 10% (w/w respect to the total weight of the  
 52 sample), [genipin] = 1% (w/w respect to gelatin), and [PEDOT:PSS] = 0 - 0.3% (w/w respect to the total  
 53 weight of the sample),  $T = 37^\circ\text{C}$ .

54

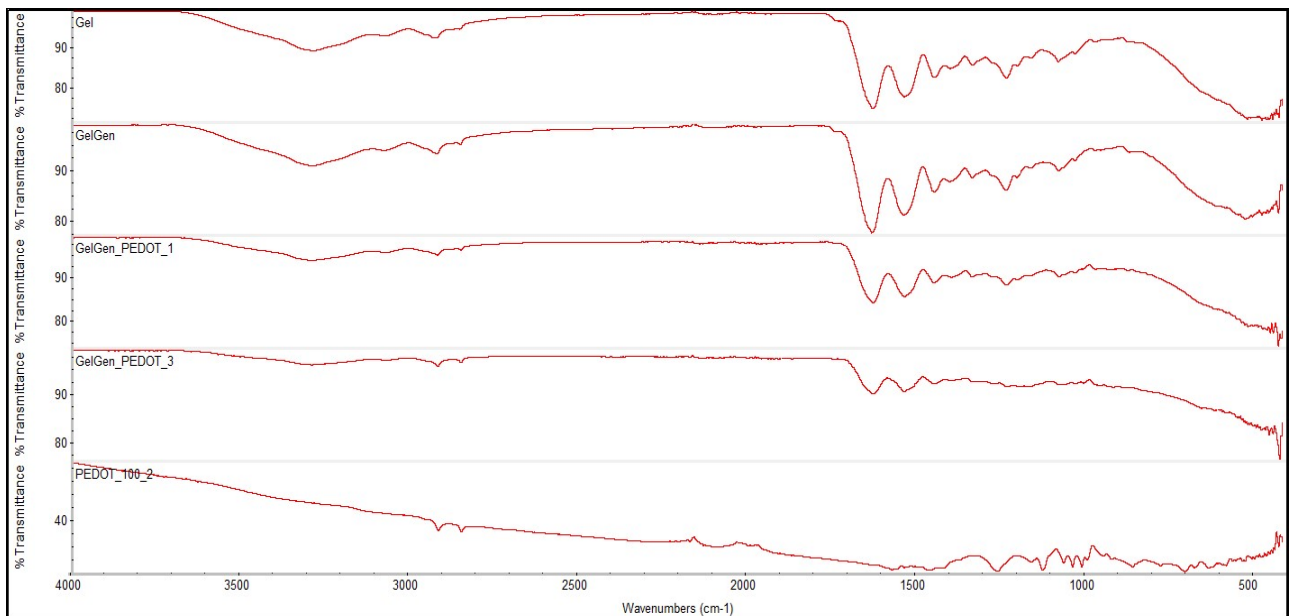

55

56 **Figure S4.** Stacked FTIR-ATR of freeze-dried samples. From the top to the bottom are reported samples  
 57 based on gelatin (Gel), genipin-crosslinked gelatin (GelGen), genipin-crosslinked gelatin (GelGen) with  
 58 PEDOT:PSS = 0.1% w/w (GelGen\_PEDOT\_1), genipin-crosslinked gelatin (GelGen) with PEDOT:PSS =

59 0.3% w/w (GelGen\_PEDOT\_3), and pure PEDOT:PSS (PEDOT\_100\_2).

60

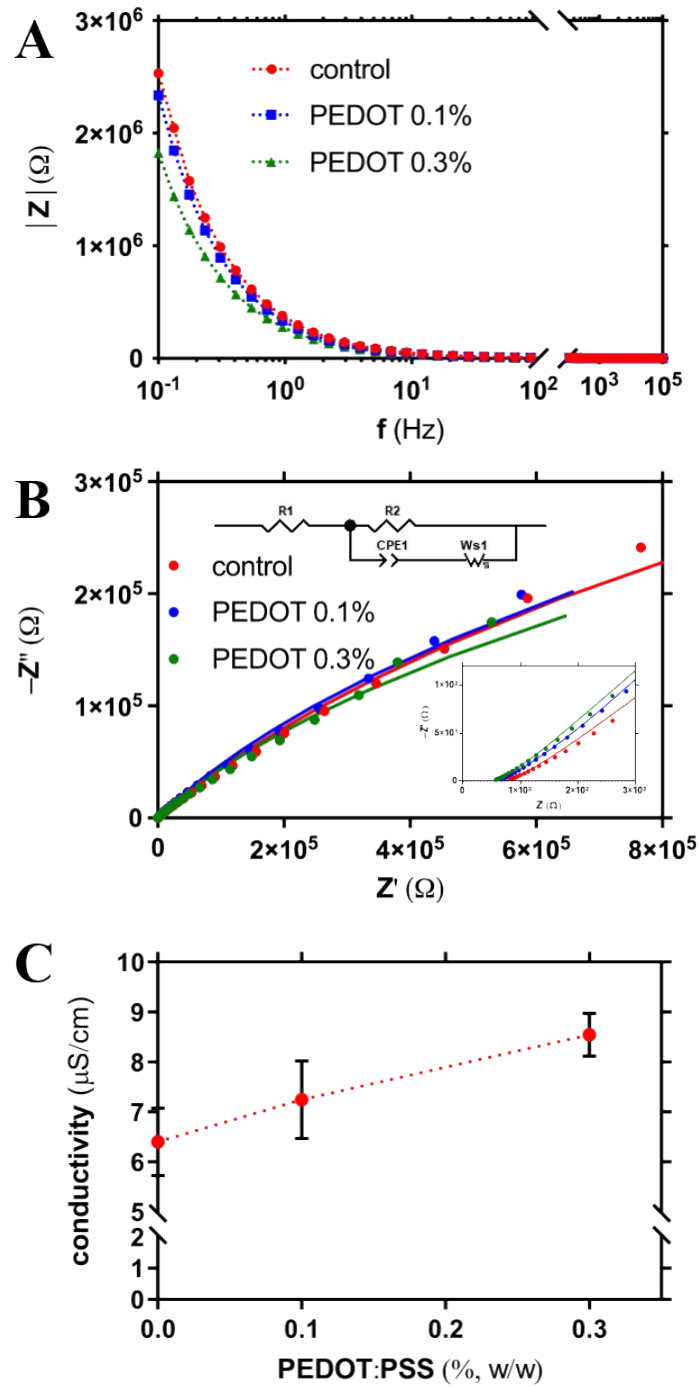

61

62 **Figure S5.** (A) Electrochemical Impedance Spectroscopy measurements of gelatin-based hydrogels with  
63 different amounts of PEDOT: [PEDOT:PSS] = 0% (w/w) (red), [PEDOT:PSS] = 0.1% (w/w) (blue), and  
64 [PEDOT:PSS] = 0.3% (w/w) (green). (B) Nyquist plot for gelatin-based hydrogels with different amounts of  
65 PEDOT: [PEDOT:PSS] = 0% (w/w) (red), [PEDOT:PSS] = 0.1% (w/w) (blue), and [PEDOT:PSS] = 0.3%  
66 (w/w) (green). Colored solid lines are the best fit of experimental points. (C) Dependence of the electronic  
67 conductivity on the amount of PEDOT. Data are reported as means  $\pm$  standard deviations (SD) of seven  
68 measurements. All dotted lines are drawn to guide the eye. Experimental conditions: [gelatin] = 10% (w/w  
69 respect to the total weight of the sample), [genipin] = 1% (w/w respect to gelatin), and [PEDOT:PSS] = 0 -  
70 0.3% (w/w respect to the total weight of the sample), PBS 1X as solvent,  $T$  = room temperature.

71

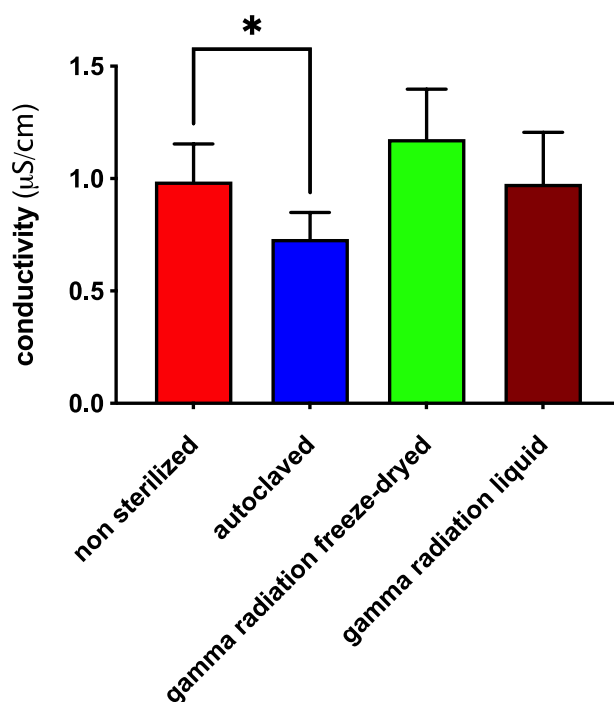

72

73 **Figure S6.** Dependence of conductivity on different sterilization techniques for PEDOT:PSS. Experimental  
 74 conditions: [gelatin] = 10% (w/w respect to the total weight of the sample), [genipin] = 1% (w/w respect to  
 75 gelatin), and [PEDOT:PSS] = 0.3% (w/w respect to the total weight of the sample). One-way ANOVA  
 76 followed by Dunnett post-hoc test was performed to compare all groups (\*: p value < 0.05). In all cases, data  
 77 are reported as means  $\pm$  standard deviations (SD) of at least five measurements.

78

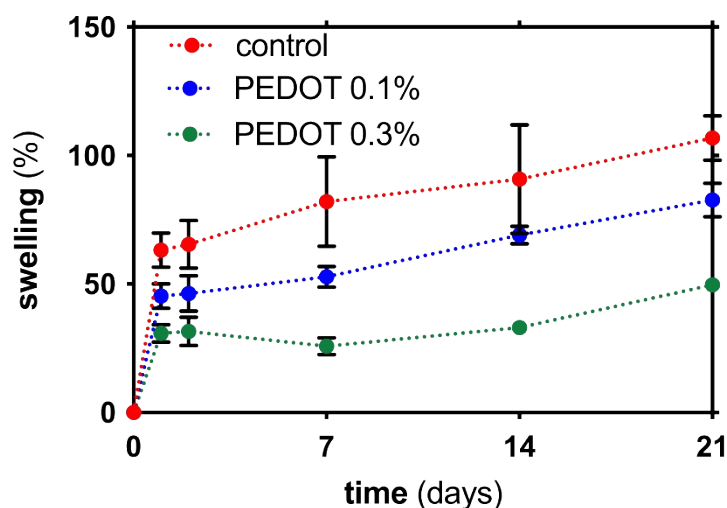

79

80 **Figure S7.** Dependence of swelling, *i.e.* PBS uptake, on time of gelatin-based hydrogels with different  
 81 amounts of PEDOT:PSS: [PEDOT:PSS] = 0% (w/w) (red), [PEDOT:PSS] = 0.1% (w/w) (blue), and  
 82 [PEDOT:PSS] = 0.3% (w/w) (green). Experimental conditions: [gelatin] = 10% (w/w respect to the total  
 83 weight of the sample), [genipin] = 1% (w/w respect to gelatin), and [PEDOT:PSS] = 0 - 0.3% (w/w respect

84 to the total weight of the sample),  $T = 37\text{ }^{\circ}\text{C}$ . In all cases, data are reported as means  $\pm$  standard deviations  
 85 (SD) of three measurements.  
 86

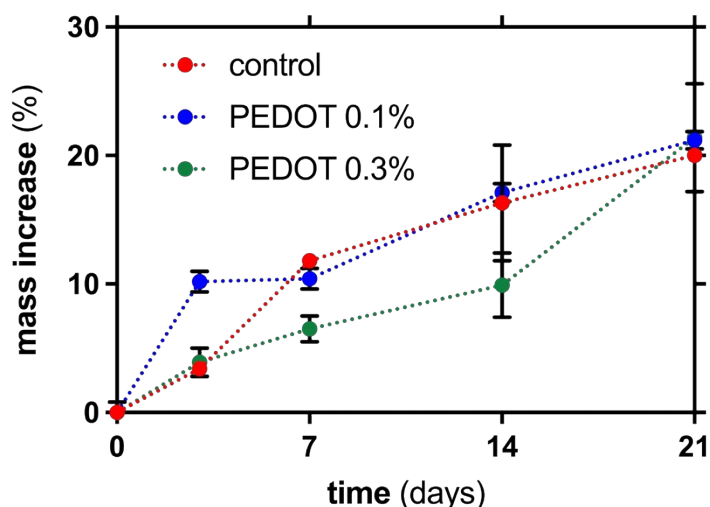

87  
 88 **Figure S8.** Dependence of mass increase on time of gelatin-based hydrogels with different amounts of  
 89 PEDOT:PSS: [PEDOT:PSS] = 0% (w/w) (red), [PEDOT:PSS] = 0.1% (w/w) (blue), and [PEDOT:PSS] =  
 90 0.3% (w/w) (green). Experimental conditions: [gelatin] = 10% (w/w respect to the total weight of the  
 91 sample), [genipin] = 1% (w/w respect to gelatin), and [PEDOT:PSS] = 0 - 0.3% (w/w respect to the total  
 92 weight of the sample),  $T = 37\text{ }^{\circ}\text{C}$ . In all cases, data are reported as means  $\pm$  standard deviations (SD) of two  
 93 measurements.  
 94  
 95

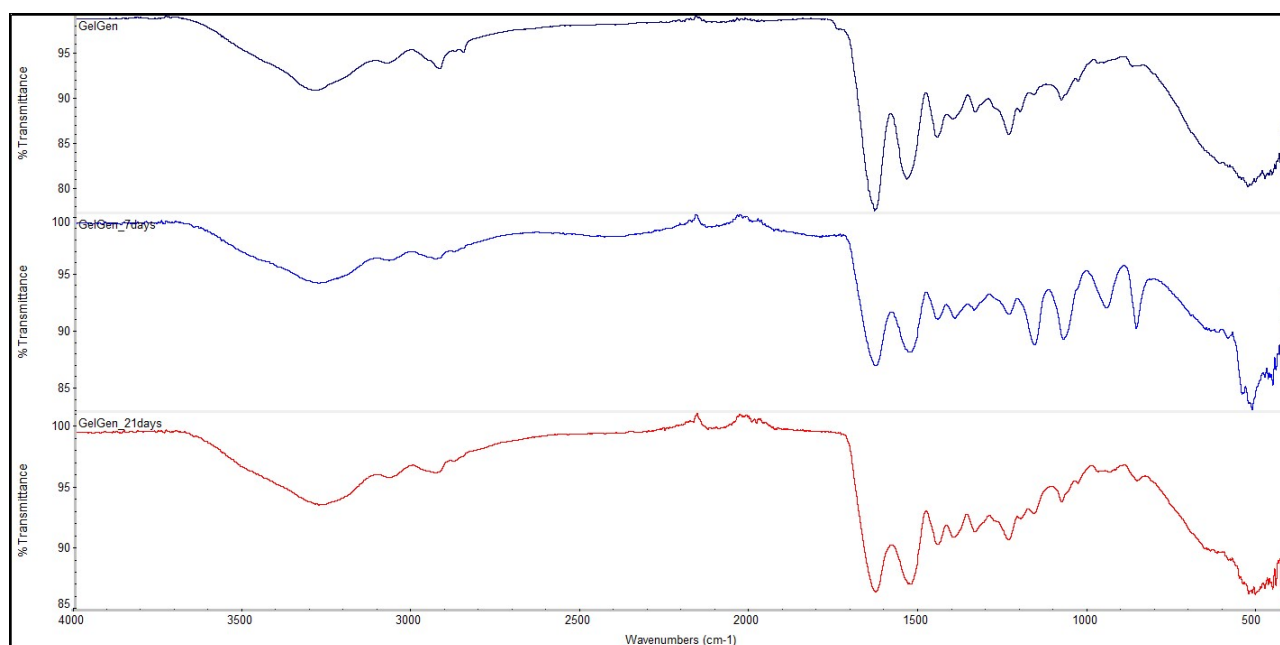

96  
 97 **Figure S9.** Stacked FTIR-ATR of genipin-crosslinked gelatin hydrogels used for degradation test and freeze-  
 98 dried. From the top to the bottom are reported samples based on the native sample and the same sample after  
 99 the incubation for 1 (7 days) and 3 weeks (21 days) in PBS. Experimental conditions: [gelatin] = 10% (w/w  
 100 respect to the total weight of the sample), [genipin] = 1% (w/w respect to gelatin).  
 101

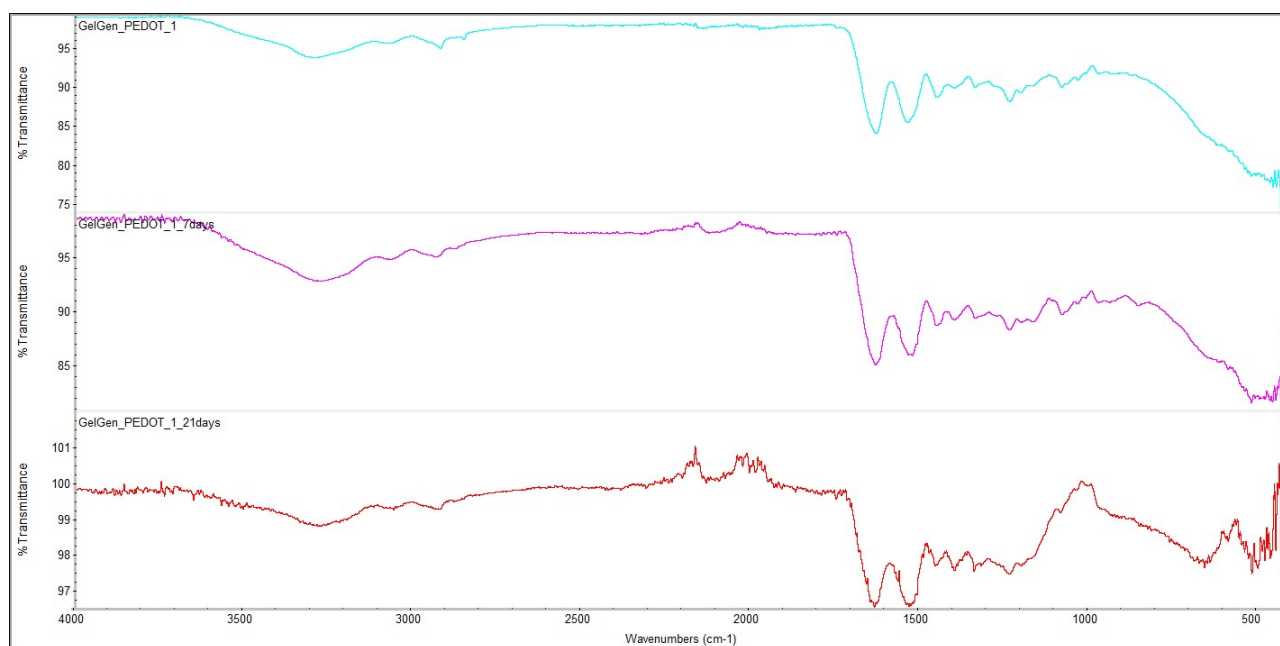

**Figure S10.** Stacked FTIR-ATR of genipin-crosslinked gelatin hydrogels used for degradation test and freeze-dried. From the top to the bottom are reported samples based on the native sample and the same sample after the incubation for 1 (7 days) and 3 weeks (21 days) in PBS. Experimental conditions: [gelatin] = 10% (w/w respect to the total weight of the sample), [genipin] = 1% (w/w respect to gelatin), and [PEDOT:PSS] = 0.1% (w/w respect to the total weight of the sample).

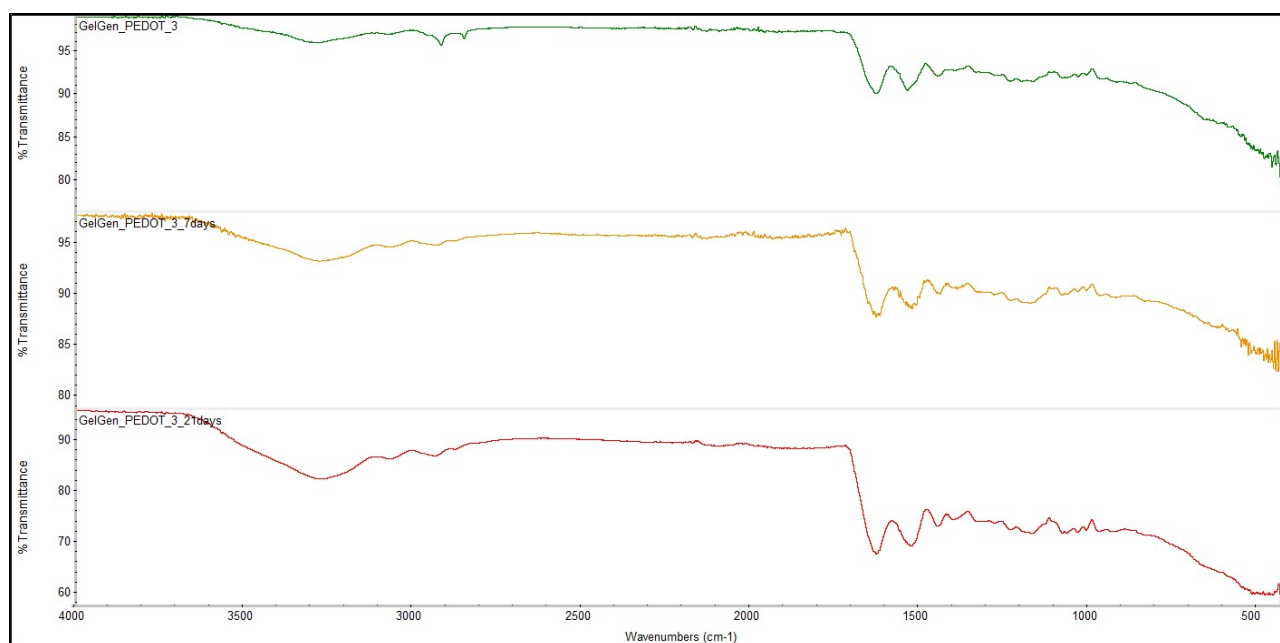

**Figure S11.** Stacked FTIR-ATR of genipin-crosslinked gelatin hydrogels used for degradation test and freeze-dried. From the top to the bottom are reported samples based on the native sample and the same sample after the incubation for 1 (7 days) and 3 weeks (21 days) in PBS. Experimental conditions: [gelatin] = 10% (w/w respect to the total weight of the sample), [genipin] = 1% (w/w respect to gelatin), and [PEDOT:PSS] = 0.3% (w/w respect to the total weight of the sample).



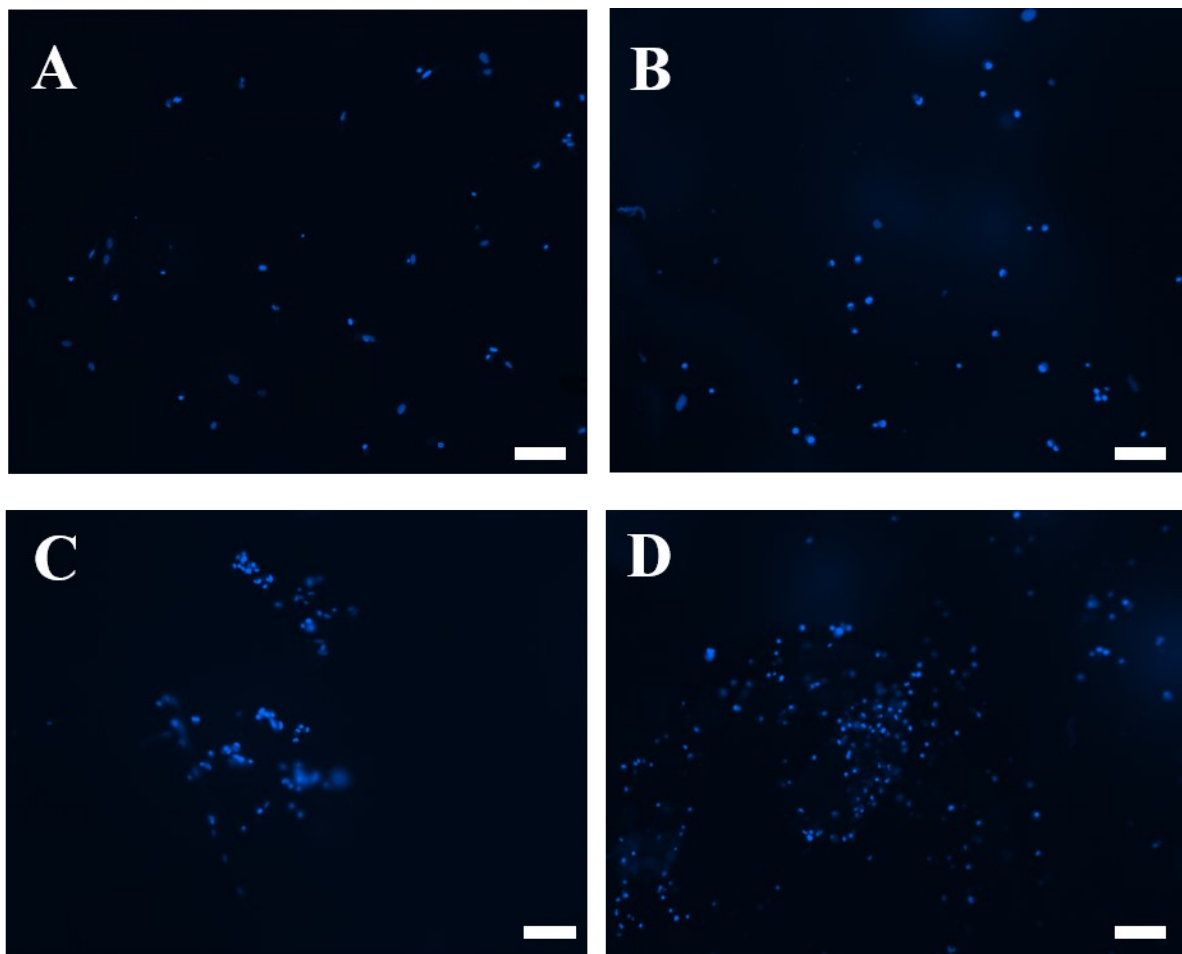

119  
120  
121 **Figure S12.** Fluorescence microscopy analyses of astrocytes after 2 (**A, B**) and 7 days (**C, D**) from cells  
122 seeding on control hydrogels (**A, C**) and on electroconductive hydrogels (**B, D**). DAPI staining of astrocytes'  
123 nuclei is revealed in blue. The scale bar stands for 100 μm for all figures.  
124

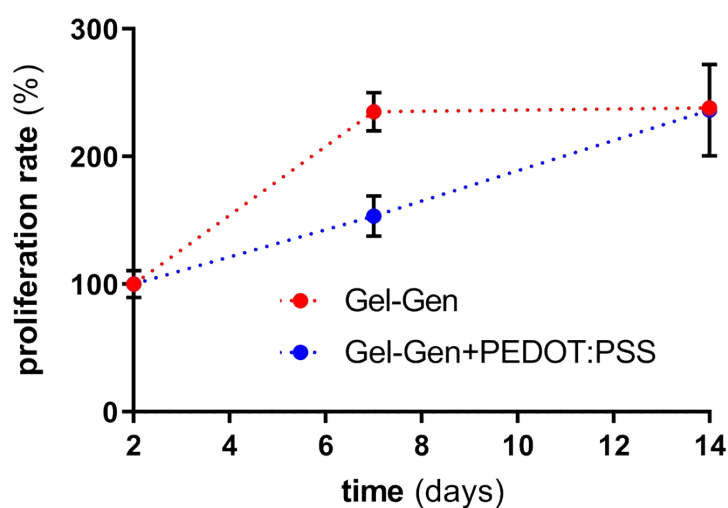

125  
126 **Figure S13.** Proliferation rate of astrocytes on electroconductive and control as function of time by Alamar  
127 blue assay. Data are plotted as the averaged percentages of reduced AB  $\pm$  Standard Error (SE).  
128
